# Supplementary material for: Exploring listening-related fatigue in children with and without hearing loss using self-report and parent-proxy measures
Source: PubMed Central journal article supplement (PMC10011639; doi:10.3389/fped.2023.1127578), 2023-02-28
Supplement: Image1.pdf [file Image1.pdf]

## *Supplementary Material*

### **Exploring listening-related fatigue in children with and without hearing loss using self-report and parent-proxy measures.**

**Bethany Adams<sup>1,2\*</sup>, Sally Thornton<sup>1,2</sup>, Graham Naylor<sup>1,2</sup>, Ruth V. Spriggs<sup>1,2</sup>, Ian Wiggins<sup>1,2†</sup>, Padraig Kitterick<sup>3†</sup>**

<sup>1</sup> National Institute for Health and Care Research (NIHR) Nottingham Biomedical Research Centre

<sup>2</sup> Hearing Sciences, Mental Health and Clinical Neurosciences, School of Medicine, University of Nottingham

<sup>3</sup> National Acoustic Laboratories, Australian Hearing Hub, Macquarie University NSW 2109, Sydney, Australia

**\* Correspondence:**

Bethany Adams

[Bethany.Adams@nottingham.ac.uk](mailto:Bethany.Adams@nottingham.ac.uk)

† These authors contributed equally to this work and share last authorship

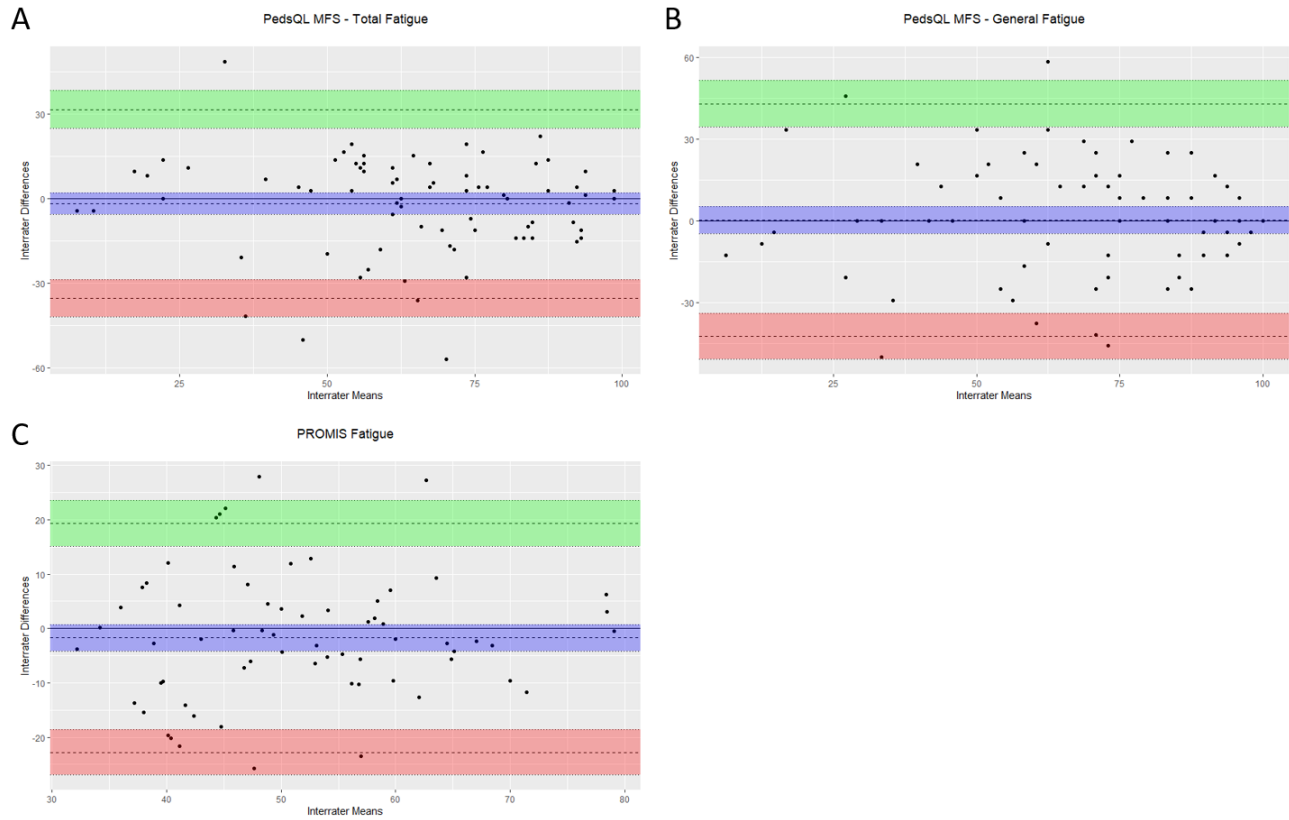

**Supplementary Figure 1.** These Bland-Altman plots illustrate the agreement between parent and child scores for the (A) PedsQL-MFS Total, (B) PedsQL-MFS General and (C) PROMIS Fatigue questionnaires. Lines are plotted indicating the limits of agreement ( $0 \pm 1.96$  S.D)
